# Supplementary material for: Genomic Divergence in Swedish Warmblood Horses Selected for Equestrian Disciplines
Source: MDPI journal article supplement (doi:10.3390/genes10120976), 2019-11-27
Supplement: s1 [file s1]

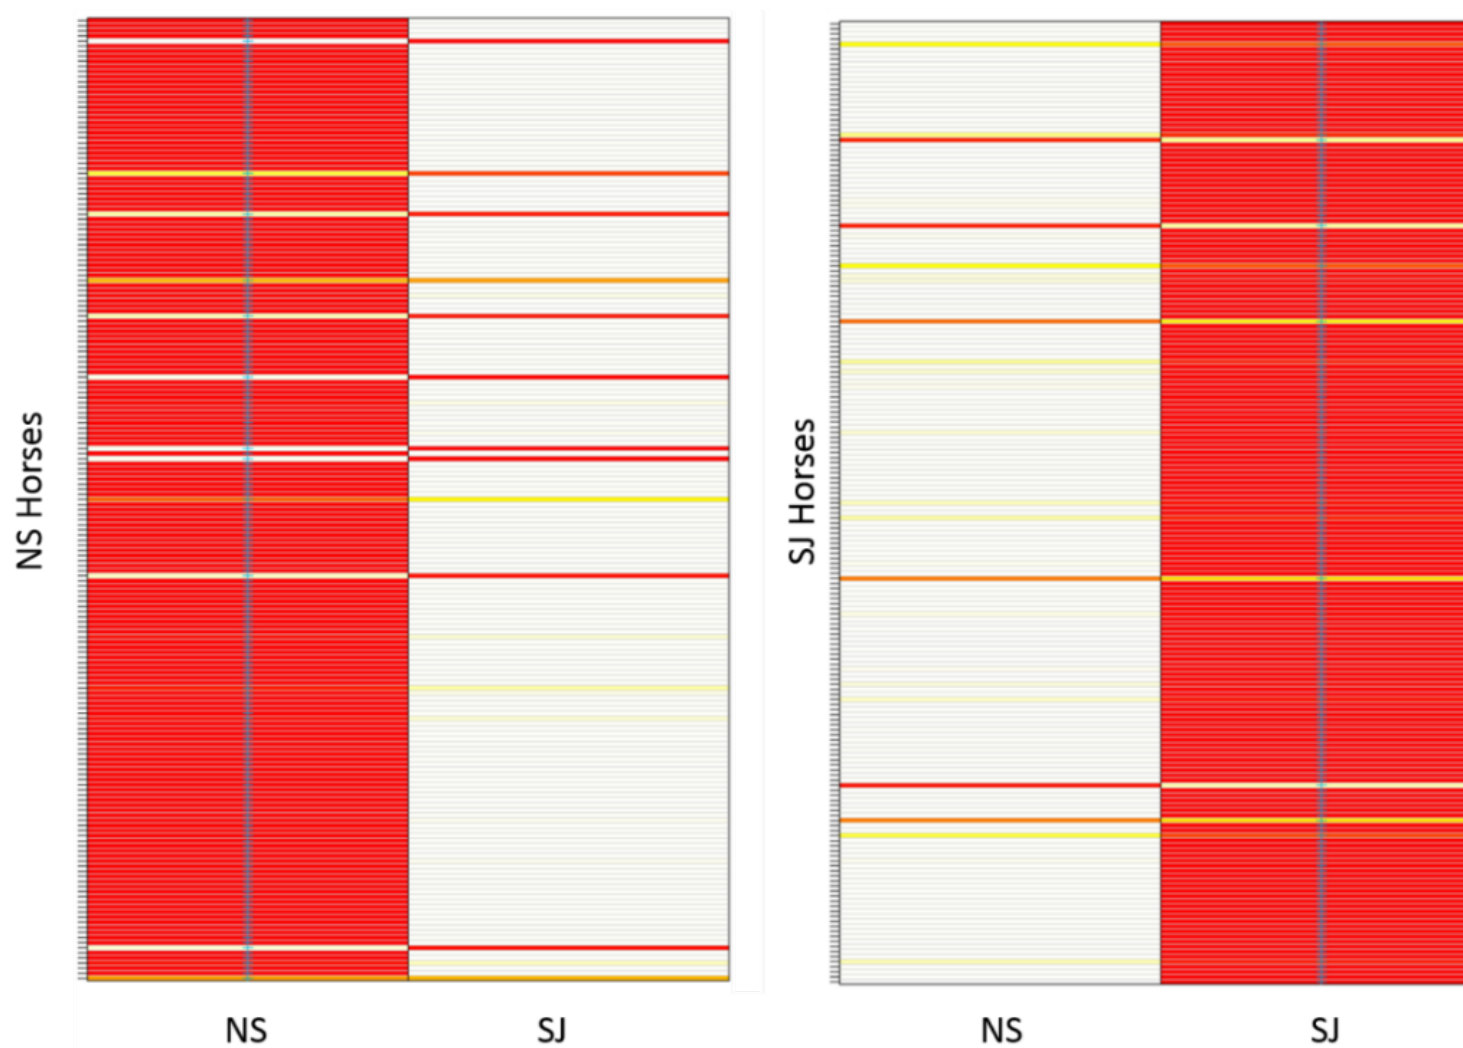

**Supplementary Figure 1.** Heatmap showing the posterior probability of each individual being assigned to the predefined subpopulations based on EBVs where non-show jumping horses (NS) are shown in the left panel and show jumping horses (SJ) are shown in the right panel. A red bar represents a membership probability equal to one and a white bar represents a membership probability of zero.
