# Supplementary material for: Genomic Divergence in Swedish Warmblood Horses Selected for Equestrian Disciplines
Source: Genes (Basel). 2019 Nov 27;10(12):976. doi: 10.3390/genes10120976 (PMC6947233; doi:10.3390/genes10120976)
Supplement: Supplementary file 1 [file genes-10-00976-s001.zip]

Archive with 8 entries (8 files):
- Supplementary Figure 1.pdf
- __MACOSX/._Supplementary Figure 1.pdf
- Table S1.xlsx
- __MACOSX/._Table S1.xlsx
- Table S2.xlsx
- __MACOSX/._Table S2.xlsx
- Table S3.xlsx
- __MACOSX/._Table S3.xlsx
