# Supplementary material for: Genomic Divergence in Swedish Warmblood Horses Selected for Equestrian Disciplines
Source: Genes (Basel). 2019 Nov 27;10(12):976. doi: 10.3390/genes10120976 (PMC6947233; doi:10.3390/genes10120976)
Supplement: Supplementary file 1 [file genes-10-00976-s001.zip › Table S1.xlsx]

## Sheet: Sheet1
Table S1. List of genes located within Fst windows around the nine top SNPs with Fst>0.20. Genes overrepresented in a PANTHER analysis are shown in bold.
Chromosome	Gene start (bp)	Gene end (bp)	Gene stable ID	Gene name	Gene type
1	34416060	34451419	ENSECAG00000036814		protein_coding
1	34525905	34581643	ENSECAG00000028267		protein_coding
1	34598182	34625689	ENSECAG00000037369		protein_coding
1	34698524	34748015	ENSECAG00000039250	CYP2C113	protein_coding
1	34788981	34820402	ENSECAG00000030406		protein_coding
1	34843443	34882160	ENSECAG00000018810	HELLS	protein_coding
1	34859227	34859557	ENSECAG00000026309	RF00100	misc_RNA
1	34891019	34970348	ENSECAG00000021438	TBC1D12	protein_coding
1	42837204	43179795	ENSECAG00000014017	PRKG1	protein_coding
1	43205006	43208327	ENSECAG00000017837	DKK1	protein_coding
5	5564149	5603417	ENSECAG00000017771	ATP1B1	protein_coding
5	5586963	5813575	ENSECAG00000011690	NME7	protein_coding
5	5813930	5836672	ENSECAG00000017383	BLZF1	protein_coding
5	5839550	5883472	ENSECAG00000008361	CCDC181	protein_coding
5	5915751	5934495	ENSECAG00000015797	SLC19A2	protein_coding
5	5964176	6039725	ENSECAG00000006860	F5	protein_coding
5	88362886	88448537	ENSECAG00000016794	ANKRD13C	protein_coding
5	88456290	88485587	ENSECAG00000017756	SRSF11	protein_coding
5	88498862	88547324	ENSECAG00000019554	LRRC40	protein_coding
5	88569124	89057869	ENSECAG00000006937	LRRC7	protein_coding
22	14079530	14083395	ENSECAG00000038331		protein_coding
22	14297747	14475340	ENSECAG00000020220	PAK5	protein_coding
22	14484015	14484254	ENSECAG00000037777		protein_coding
22	14484658	14500221	ENSECAG00000009366	LAMP5	protein_coding
22	14505665	14508154	ENSECAG00000033273		lncRNA
22	14530500	14776538	ENSECAG00000012335	PLCB4	protein_coding
22	15087058	15753614	ENSECAG00000021224	PLCB1	protein_coding
22	15864191	15906960	ENSECAG00000007522	TMX4	protein_coding
22	15935386	15985720	ENSECAG00000010314	HAO1	protein_coding
