# Supplementary material for: Genomic Divergence in Swedish Warmblood Horses Selected for Equestrian Disciplines
Source: Genes (Basel). 2019 Nov 27;10(12):976. doi: 10.3390/genes10120976 (PMC6947233; doi:10.3390/genes10120976)
Supplement: Supplementary file 1 [file genes-10-00976-s001.zip › Table S2.xlsx]

## Sheet: SJ
Table S2. List of genes and genomic elements located with all significant XPEHH regions in SJ horses. Genes overrepresented in the PANTHER analysis are shown in bold.
Chromosome	Gene start (bp)	Gene end (bp)	Gene stable ID	Gene name	Gene type
7	89626174	90023454	ENSECAG00000017807	NAV2	protein_coding
7	90049571	90053641	ENSECAG00000019994	DBX1	protein_coding
7	90062343	90062464	ENSECAG00000025696	eca-mir-1302c-5	miRNA
7	90174293	90178174	ENSECAG00000030698		protein_coding
7	90229868	90245531	ENSECAG00000020077	HTATIP2	protein_coding
7	90248266	90383616	ENSECAG00000021124	PRMT3	protein_coding
7	90298515	90301838	ENSECAG00000029128		protein_coding
7	90433642	90488500	ENSECAG00000022340	SLC6A5	protein_coding
7	90502233	91321050	ENSECAG00000024835	NELL1	protein_coding
8	10862639	10919434	ENSECAG00000010198	PITPNB	protein_coding
8	10963357	11007491	ENSECAG00000019170	MN1	protein_coding
8	11299224	11332027	ENSECAG00000029258		lncRNA
8	11340793	11346622	ENSECAG00000031780		lncRNA
8	11341304	11346622	ENSECAG00000036895		lncRNA
8	11349511	11350844	ENSECAG00000033180		lncRNA
12	11495383	11674749	ENSECAG00000024739	C12H11orf49	protein_coding
12	11608467	11608570	ENSECAG00000025453	RF00026	snRNA
12	11673931	11684150	ENSECAG00000024744	ARFGAP2	protein_coding
12	11685623	11690380	ENSECAG00000025103	PACSIN3	protein_coding
12	11705160	11728840	ENSECAG00000008711	DDB2	protein_coding
12	11729758	11738090	ENSECAG00000013128	ACP2	protein_coding
12	11743566	11749748	ENSECAG00000015726	NR1H3	protein_coding
12	11754435	11788181	ENSECAG00000016022	MADD	protein_coding
12	11786269	11807257	ENSECAG00000024318	MYBPC3	protein_coding
12	11809660	11825650	ENSECAG00000024457	SPI1	protein_coding
12	11847995	11848996	ENSECAG00000032379		lncRNA
12	11849997	11858269	ENSECAG00000024590	SLC39A13	protein_coding
12	11858729	11864419	ENSECAG00000024786	PSMC3	protein_coding
12	11875857	11886619	ENSECAG00000003289	RAPSN	protein_coding
12	11898228	11949746	ENSECAG00000007741	CELF1	protein_coding
12	11975180	11981432	ENSECAG00000012816	PTPMT1	protein_coding
12	11981975	11985604	ENSECAG00000013258	KBTBD4	protein_coding
12	11984628	11990759	ENSECAG00000013454	NDUFS3	protein_coding
12	11992120	11993762	ENSECAG00000014163	FAM180B	protein_coding
12	11995006	11995980	ENSECAG00000014184		pseudogene
12	12016876	12032587	ENSECAG00000014198	MTCH2	protein_coding
12	12064825	12108787	ENSECAG00000018720	AGBL2	protein_coding
12	28801394	28812904	ENSECAG00000035459		protein_coding
12	28822350	28828292	ENSECAG00000018075	ARL2	protein_coding
12	28831842	28840339	ENSECAG00000018173	SNX15	protein_coding
12	28841141	28843665	ENSECAG00000016053	SAC3D1	protein_coding
12	28844216	28854600	ENSECAG00000018798	NAALADL1	protein_coding
12	28863461	28879240	ENSECAG00000019578	CDCA5	protein_coding
12	28879548	28883204	ENSECAG00000019712	ZFPL1	protein_coding
12	28887608	28896985	ENSECAG00000020469	VPS51	protein_coding
12	28897104	28901396	ENSECAG00000021411	TM7SF2	protein_coding
12	28901818	28903029	ENSECAG00000021748	ZNHIT2	protein_coding
12	28905425	28906895	ENSECAG00000021956	FAU	protein_coding
12	28907055	28909823	ENSECAG00000022196	MRPL49	protein_coding
12	28910958	28917148	ENSECAG00000022480	SYVN1	protein_coding
12	28961120	28962272	ENSECAG00000031458		protein_coding
12	28968152	28991540	ENSECAG00000022942	CAPN1	protein_coding
12	28992996	29016395	ENSECAG00000023574		protein_coding
12	29041816	29066727	ENSECAG00000024194	POLA2	protein_coding
12	29086121	29086765	ENSECAG00000006867	CDC42EP2	protein_coding
12	29095703	29109188	ENSECAG00000001650	DPF2	protein_coding
12	29112607	29114022	ENSECAG00000006896	TIGD3	protein_coding
12	29122705	29127934	ENSECAG00000006906	SLC25A45	protein_coding
12	29131484	29152443	ENSECAG00000007115	FRMD8	protein_coding
12	29165908	29166029	ENSECAG00000031012	RF01955	misc_RNA
12	29166272	29166387	ENSECAG00000037099	RF01956	misc_RNA
12	29166603	29166761	ENSECAG00000036949	RF01957	misc_RNA
12	29300604	29300724	ENSECAG00000028838	RF01955	misc_RNA
12	29300961	29301073	ENSECAG00000032017	RF01956	misc_RNA
12	29301287	29301445	ENSECAG00000037033	RF01957	misc_RNA
12	29304008	29304122	ENSECAG00000034865	RF01956	misc_RNA
13	27182897	27385137	ENSECAG00000022181		protein_coding
13	27403862	27426741	ENSECAG00000021501	UQCRC2	protein_coding
13	27427791	27440523	ENSECAG00000020496	PDZD9	protein_coding
13	27447476	27511140	ENSECAG00000020342		protein_coding
13	27526717	27580812	ENSECAG00000009842	VWA3A	protein_coding
13	27539875	27543222	ENSECAG00000040281		protein_coding
13	27585017	27600546	ENSECAG00000008735	SDR42E2	protein_coding
13	27620138	27669038	ENSECAG00000022924	EEF2K	protein_coding
13	27674709	27677909	ENSECAG00000035892		protein_coding
13	27687817	27718707	ENSECAG00000015801	POLR3E	protein_coding
13	27730933	27753546	ENSECAG00000014770	CDR2	protein_coding
13	27768928	27769142	ENSECAG00000026484	RF00012	snoRNA
13	27781469	27785226	ENSECAG00000032658		lncRNA
13	27810710	27854689	ENSECAG00000017507		protein_coding
19	41389013	41607791	ENSECAG00000024935	GSK3B	protein_coding
19	41598898	41627600	ENSECAG00000008728	NR1I2	protein_coding
19	41642775	41704190	ENSECAG00000016423	MAATS1	protein_coding
19	41712232	41714364	ENSECAG00000037526	COX17	protein_coding
19	41728306	41744201	ENSECAG00000021468	POPDC2	protein_coding
19	41761592	41786165	ENSECAG00000022707	PLA1A	protein_coding
19	41789983	41802421	ENSECAG00000023958	ADPRH	protein_coding
19	41814054	41840948	ENSECAG00000002211	CD80	protein_coding
19	41822782	41822938	ENSECAG00000025246	RF00003	snRNA
19	41842839	41863178	ENSECAG00000005889	TIMMDC1	protein_coding
19	41868556	41888733	ENSECAG00000010757	POGLUT1	protein_coding
19	41892242	41922685	ENSECAG00000020653	TMEM39A	protein_coding
19	41931945	42037957	ENSECAG00000007228	ARHGAP31	protein_coding
22	27886819	27974154	ENSECAG00000011582	DLGAP4	protein_coding
22	27990413	27994240	ENSECAG00000007545	MYL9	protein_coding
22	28029100	28039167	ENSECAG00000038953		protein_coding
22	28058222	28067217	ENSECAG00000010948	RAB5IF	protein_coding
22	28068662	28086618	ENSECAG00000014135	SLA2	protein_coding
22	28094843	28147979	ENSECAG00000016390	NDRG3	protein_coding
22	28169673	28255972	ENSECAG00000019507	SOGA1	protein_coding
22	28265229	28274043	ENSECAG00000008789	TLDC2	protein_coding
22	28277115	28327778	ENSECAG00000008959	SAMHD1	protein_coding
22	28346022	28407057	ENSECAG00000024316	RBL1	protein_coding
22	28420229	28469484	ENSECAG00000011332	MROH8	protein_coding
22	28469505	28524034	ENSECAG00000018381	RPN2	protein_coding
22	28529919	28533665	ENSECAG00000011318	GHRH	protein_coding
22	28562881	28563048	ENSECAG00000011341	MANBAL	protein_coding
22	28633300	28649766	ENSECAG00000012072	SRC	protein_coding
22	28653017	28654180	ENSECAG00000032280		lncRNA
22	28695652	28741584	ENSECAG00000035784		lncRNA
22	28749044	28749307	ENSECAG00000030259	BLCAP	protein_coding
22	28751140	28752958	ENSECAG00000036225		protein_coding
22	28892970	29050687	ENSECAG00000017144	CTNNBL1	protein_coding
22	29076735	29113525	ENSECAG00000037272	VSTM2L	protein_coding
22	29139685	29183745	ENSECAG00000013760	TTI1	protein_coding
22	29183841	29234284	ENSECAG00000018017	RPRD1B	protein_coding
22	29270953	29302727	ENSECAG00000006290	TGM2	protein_coding
22	29342302	29382418	ENSECAG00000017454	KIAA1755	protein_coding
22	29406550	29439276	ENSECAG00000022085	BPI	protein_coding
22	29446602	29470936	ENSECAG00000014553	LBP	protein_coding
22	29554174	29554308	ENSECAG00000026245	RF00056	snoRNA
22	29555965	29556097	ENSECAG00000025561	RF00056	snoRNA
22	29556720	29558949	ENSECAG00000031862		lncRNA
22	29556918	29557032	ENSECAG00000027074	RF00056	snoRNA
22	29557241	29557372	ENSECAG00000028926	RF00056	snoRNA
22	29570357	29575993	ENSECAG00000038773		lncRNA
22	29571351	29571482	ENSECAG00000038811	RF00056	snoRNA
22	29573213	29573345	ENSECAG00000025684	RF00056	snoRNA
22	29574565	29574698	ENSECAG00000026160	RF00056	snoRNA
22	29604080	29714277	ENSECAG00000004465	RALGAPB	protein_coding
22	29638394	29641620	ENSECAG00000031039		protein_coding
22	29663719	29663822	ENSECAG00000027501	RF01210	snoRNA
22	29683620	29687553	ENSECAG00000019945	ADIG	protein_coding
22	29713363	29733545	ENSECAG00000020026	ARHGAP40	protein_coding
22	29795146	29799965	ENSECAG00000022995	SLC32A1	protein_coding
22	29811014	29833704	ENSECAG00000024781	ACTR5	protein_coding
22	29859462	29953734	ENSECAG00000008784	PPP1R16B	protein_coding
22	29960186	29980315	ENSECAG00000013238	FAM83D	protein_coding
22	29987494	30055371	ENSECAG00000013881	DHX35	protein_coding
22	30093906	30095844	ENSECAG00000035615		lncRNA
22	30116487	30118630	ENSECAG00000031493		lncRNA
22	30144262	30146487	ENSECAG00000038194		lncRNA
22	30194028	30232341	ENSECAG00000030288		lncRNA
22	30327270	30327683	ENSECAG00000040636		protein_coding
22	30559120	30575763	ENSECAG00000037456		lncRNA
22	30748291	30748353	ENSECAG00000036790	eca-mir-1255b	miRNA
22	30853621	30871059	ENSECAG00000039049		lncRNA
22	30923375	30932893	ENSECAG00000030067		lncRNA
22	31049823	31087624	ENSECAG00000036579		lncRNA
22	31216808	31218301	ENSECAG00000034048		lncRNA
22	31433933	31434904	ENSECAG00000024705	MAFB	protein_coding
22	31596334	31602136	ENSECAG00000031009		lncRNA
22	31602198	31705814	ENSECAG00000030230		lncRNA
22	31721865	31805610	ENSECAG00000000383	TOP1	protein_coding
31	13821280	13821603	ENSECAG00000035662		protein_coding
31	14019394	14137652	ENSECAG00000038753		lncRNA
31	14289361	14315806	ENSECAG00000022231	RGS17	protein_coding
