# Supplementary material for: Genomic Divergence in Swedish Warmblood Horses Selected for Equestrian Disciplines
Source: Genes (Basel). 2019 Nov 27;10(12):976. doi: 10.3390/genes10120976 (PMC6947233; doi:10.3390/genes10120976)
Supplement: Supplementary file 1 [file genes-10-00976-s001.zip › Table S3.xlsx]

## Sheet: Sheet1
Table S3. List of genes and genomic elements located with all significant XPEHH regions in NS horses. Genes overrepresented in the PANTHER analysis are shown in bold.
Chromosome	Gene start (bp)	Gene end (bp)	Gene stable ID	Gene name	Gene type
1	40592175	40611043	ENSECAG00000040253		lncRNA
1	40645693	40672650	ENSECAG00000033700		lncRNA
1	40721632	40767981	ENSECAG00000033405		lncRNA
1	40857487	40941794	ENSECAG00000017012	PTEN	protein_coding
1	40984941	41032681	ENSECAG00000000473	ATAD1	protein_coding
1	41041725	41182864	ENSECAG00000008426	PAPSS2	protein_coding
1	41049587	41049712	ENSECAG00000025194	RF00619	snRNA
1	41182850	41267017	ENSECAG00000012951	MINPP1	protein_coding
1	41536973	41656352	ENSECAG00000000125	SGMS1	protein_coding
1	41673609	41775939	ENSECAG00000006259		protein_coding
1	41815374	41863836	ENSECAG00000010424	A1CF	protein_coding
1	41969486	41988124	ENSECAG00000034071		lncRNA
1	42072015	42142487	ENSECAG00000034975		protein_coding
1	42647313	42649172	ENSECAG00000004701	CSTF2T	protein_coding
1	42837204	43179795	ENSECAG00000014017	PRKG1	protein_coding
1	43205006	43208327	ENSECAG00000017837	DKK1	protein_coding
1	43294744	43423003	ENSECAG00000036776		lncRNA
23	51238106	51393666	ENSECAG00000008989	AUH	protein_coding
23	51494049	51496836	ENSECAG00000028478		lncRNA
23	51505144	51543324	ENSECAG00000029666		lncRNA
23	51545997	51548741	ENSECAG00000028528		protein_coding
23	51617289	51682884	ENSECAG00000009488	SYK	protein_coding
23	51801949	51803551	ENSECAG00000037086		lncRNA
23	51842783	51843382	ENSECAG00000002969	DIRAS2	protein_coding
23	51844418	51846991	ENSECAG00000029144		protein_coding
25	5209140	5537995	ENSECAG00000009066	GABBR2	protein_coding
25	5562009	5609393	ENSECAG00000016143	ANKS6	protein_coding
25	5631576	5691074	ENSECAG00000016546	GALNT12	protein_coding
25	5739662	5841756	ENSECAG00000021211	COL15A1	protein_coding
25	5898574	5923520	ENSECAG00000004757	TGFBR1	protein_coding
25	5977703	5981706	ENSECAG00000011920	ALG2	protein_coding
25	5982047	5989768	ENSECAG00000026930	SEC61B	protein_coding
25	37398473	37402845	ENSECAG00000037647		protein_coding
25	37400945	37423271	ENSECAG00000000436		protein_coding
25	37472259	37474494	ENSECAG00000036361		lncRNA
25	37502247	37510693	ENSECAG00000032115		lncRNA
25	37519941	37558211	ENSECAG00000016957	OLFM1	protein_coding
25	37673074	37674802	ENSECAG00000034348		lncRNA
25	37691307	37691451	ENSECAG00000033548	eca-mir-9042	miRNA
25	37796640	37810483	ENSECAG00000033001		lncRNA
25	37809693	37810697	ENSECAG00000038736		lncRNA
25	37813294	37816926	ENSECAG00000038957	PPP1R26	protein_coding
25	37823576	37827267	ENSECAG00000029848	C9orf116	protein_coding
25	37827523	37831501	ENSECAG00000032143	MRPS2	protein_coding
25	37862367	37865282	ENSECAG00000032975		protein_coding
25	37872685	37875886	ENSECAG00000029369		protein_coding
